# Supplementary material for: epiLiver a novel tumor specific, high throughput and cost-effective blood test for specific detection of liver cancer (HCC)
Source: Research Square preprint supplement (doi:10.21203/rs.3.rs-225208/v1), 2021-02-23
Supplement: Supplementary file 4 [file 90387fa2e8c5a6be8e3e2c3f.xlsx]

## Sheet: Sheet1
	SUMMARY OUTPUT
	Regression Statistics
	Multiple R	0.8108
	R Square	0.657396
	Adjusted R Square	0.647608
	Standard Error	0.296643
	Observations	145
	ANOVA
		df	SS	MS	F	Significance F
	Regression	4	23.6391	5.90977	67.1589	1.28145e-31
	Residual	140	12.3196	0.0879968
	Total	144	35.9586
		Coefficients	Standard Error	t Stat	P-value	Lower 95%	Upper 95%	Lower 95.0%	Upper 95.0%
	Intercept	0.0641687	0.034504	1.85975	0.0650201	-0.00404759	0.132385	-0.00404759	0.132385
	cg03768777	0.751194	0.158781	4.73101	5.3981e-06	0.437276	1.06511	0.437276	1.06511
	cg24804544	0.426771	0.136971	3.11578	0.00222623	0.155972	0.69757	0.155972	0.69757
	cg05739190	0.639744	0.135595	4.71806	5.70305e-06	0.371666	0.907822	0.371666	0.907822
	cg02012576	0.804234	0.17977	4.47368	1.5783e-05	0.448818	1.15965	0.448818	1.15965
	sensitivity	0.984849
	specificity	1
	cutoff	0.239724
	accuracy	0.993103
	AUC	0.990986
