# Supplementary material for: epiLiver a novel tumor specific, high throughput and cost-effective blood test for specific detection of liver cancer (HCC)
Source: Research Square preprint supplement (doi:10.21203/rs.3.rs-225208/v1), 2021-02-23
Supplement: Supplementary file 5 [file 0609bd31a986521dc6e79b8a.xlsx]

## Sheet: Sheet1
SUMMARY OUTPUT
Regression Statistics
Multiple R	0.798739
R Square	0.637984
Adjusted R Square	0.633674
Standard Error	0.257195
Observations	86
ANOVA
	df	SS	MS	F	Significance F
Regression	1	9.79231	9.79231	148.034	3.16116e-20
Residual	84	5.55652	0.0661491
Total	85	15.3488
	Coefficients	Standard Error	t Stat	P-value	Lower 95%	Upper 95%	Lower 95.0%	Upper 95.0%
Intercept	0.179496	0.0557164	3.2216	0.00181443	0.0686979	0.290294	0.0686979	0.290294
cg14126493	1.34671	0.110687	12.1669	3.16116e-20	1.1266	1.56683	1.1266	1.56683
