# Supplementary material for: epiLiver a novel tumor specific, high throughput and cost-effective blood test for specific detection of liver cancer (HCC)
Source: Research Square preprint supplement (doi:10.21203/rs.3.rs-225208/v1), 2021-02-23
Supplement: Supplementary file 6 [file 1467d6ab41984b8509b70524.xlsx]

## Sheet: Sheet1
TCGA	Study Abbreviation	Study Name	Cancer Subject number	NAT subject number	Total
TCGA-ACC	ACC	Adrenocortical carcinoma	80	0	80
TCGA-BLCA	BLCA	Bladder Urothelial Carcinoma	412	21	433
TCGA-BRCA	BRCA	Breast invasive carcinoma	796	95	891
TCGA-CESC	CESC	Cervical squamous cell carcinoma and endocervical adenocarcinoma	309	3	312
TCGA-CHOL	CHOL	Cholangiocarcinoma	36	9	45
TCGA-COAD	COAD	Colon adenocarcinoma	315	38	353
TCGA-DLBC	DLBC	Lymphoid Neoplasm Diffuse Large B-cell Lymphoma	48	0	48
TCGA-ESCA	ESCA	Esophageal carcinoma	186	16	202
TCGA-GBM	GBM	Glioblastoma multiforme	153	2	155
TCGA-HNSC	HNSC	Head and Neck squamous cell carcinoma	530	50	580
TCGA-KICH	KICH	Kidney Chromophobe	66	0	66
TCGA-KIRC	KIRC	Kidney renal clear cell carcinoma	325	159	484
TCGA-KIRP	KIRP	Kidney renal papillary cell carcinoma	276	45	321
TCGA-LAML	LAML	Acute Myeloid Leukemia	140	0	140
TCGA-LGG	LGG	Brain Lower Grade Glioma	534	0	534
TCGA-LIHC	LIHC	Liver hepatocellular carcinoma	380	50	430
TCGA-LUAD	LUAD	Lung adenocarcinoma	411	22	433
TCGA-LUSC	LUSC	Lung squamous cell carcinoma	337	36	373
TCGA-MESO	MESO	Mesothelioma	87	0	87
TCGA-OV	OV	Ovarian serous cystadenocarcinoma	10	0	10
TCGA-PAAD	PAAD	Pancreatic adenocarcinoma	185	10	195
TCGA-PCPG	PCPG	Pheochromocytoma and Paraganglioma	184	3	187
TCGA-PRAD	PRAD	Prostate adenocarcinoma	503	50	553
TCGA-READ	READ	Rectum adenocarcinoma	99	7	106
TCGA-SARC	SARC	Sarcoma	265	4	269
TCGA-SKCM	SKCM	Skin Cutaneous Melanoma	473	2	475
TCGA-STAD	STAD	Stomach adenocarcinoma	395	2	397
TCGA-TGCT	TGCT	Testicular Germ Cell Tumors	156	0	156
TCGA-THCA	THCA	Thyroid carcinoma	515	56	571
TCGA-THYM	THYM	Thymoma	124	2	126
TCGA-UCEC	UCEC	Uterine Corpus Endometrial Carcinoma	439	45	484
TCGA-UCS	UCS	Uterine Carcinosarcoma	57	0	57
TCGA-UVM	UVM	Uveal Melanoma	80	0	80
Total			8906	727	9633
