# Supplementary material for: epiLiver a novel tumor specific, high throughput and cost-effective blood test for specific detection of liver cancer (HCC)
Source: Research Square preprint supplement (doi:10.21203/rs.3.rs-225208/v1), 2021-02-23
Supplement: Supplementary file 7 [file 31b575038b9f71149862f889.xlsx]

## Sheet: Sheet1
			HCC detect sum		ROC	sensitivity	specificity
				HCC blood	0.993	95	97
				HCC other normal	0.9484	84	95
				HCC blood and normal	0.985	91	95
				HCC NAT	0.9186	85	95
			HCC detect +spec sum	HCC blood	0.9981	99	99
				HCC other normal	0.9958	95	98
				HCC blood an normal	0.996	97	98
				HCC NAT	0.9656	92	95
			Number of samples with methylation >0.2		Vash2	GRID2IP	CHFR	CCNJ	F12
				HCC	420	332	388	305	747
				Other blood normal no HCC	0	1	5	0	0
					0.586819	0.501901	0.579214	0.442332	0.968314
